# Supplementary material for: Impact of creatinine clearance on outcomes in patients with non-valvular atrial fibrillation: a subanalysis of the J-RHYTHM Registry
Source: PubMed Central journal article supplement — Eur Heart J Qual Care Clin Outcomes. 2017 Sep 1;4(1):59–68. doi: 10.1093/ehjqcco/qcx032 (PMC5862022; doi:10.1093/ehjqcco/qcx032), 2017-09-01
Supplement: supplementarytables_qcx032.pdf [file supplementarytables_qcx032.pdf]

**Supplementary Table 1. Baseline characteristics and medications in patients with and without creatinine clearance data**

|                                              | <b>Overall<br/>(n=7406)</b> | <b>CrCl (-)<br/>(n=1354)</b> | <b>CrCl (+)<br/>(n=6052)</b> | <b>P value*</b> |
|----------------------------------------------|-----------------------------|------------------------------|------------------------------|-----------------|
| Age, years                                   | 69.8±10.0                   | 69.7±10.0                    | 69.8±10.0                    | 0.823           |
| Female                                       | 2165 (29.2)                 | 419 (30.9)                   | 1746 (28.8)                  | 0.125           |
| Body weight, kg                              | 62.4±12.8<br>[n=6432]       | 63.1±11.4<br>[n=380]         | 62.3±12.9                    | 0.248           |
| <b>Renal function</b>                        |                             |                              |                              |                 |
| Serum creatinine, mg/dL                      | 1.0±0.6<br>[n=6578]         | 0.9±0.4<br>[n=526]           | 1.0±0.6                      | 0.098           |
| CrCl, mL/min                                 | 68.3±27.7<br>[n=6052]       | -                            | 68.3±27.7                    | -               |
| <b>Type of atrial fibrillation</b>           |                             |                              |                              |                 |
| Paroxysmal                                   | 2835 (38.3)                 | 553 (40.8)                   | 2282 (37.7)                  | <0.001          |
| Persistent                                   | 1081 (14.6)                 | 235 (17.4)                   | 846 (14.0)                   |                 |
| Permanent                                    | 3490 (47.1)                 | 566 (41.8)                   | 2924 (48.3)                  |                 |
| <b>Comorbidities</b>                         |                             |                              |                              |                 |
| Coronary artery disease                      | 781 (10.5)                  | 105 (7.8)                    | 676 (11.2)                   | <0.001          |
| Cardiomyopathy                               | 634 (8.6)                   | 87 (6.4)                     | 547 (9.0)                    | 0.002           |
| HCM                                          | 264 (3.6)                   | 33 (2.4)                     | 231 (3.8)                    | 0.013           |
| DCM                                          | 370 (5.0)                   | 54 (4.0)                     | 316 (5.2)                    | 0.060           |
| COPD                                         | 131 (1.8)                   | 15 (1.1)                     | 116 (1.9)                    | 0.041           |
| Hyperthyroidism                              | 131 (1.8)                   | 29 (2.1)                     | 102 (1.7)                    | 0.249           |
| <b>Risk factors for stroke</b>               |                             |                              |                              |                 |
| Heart failure                                | 2055 (27.7)                 | 303 (22.4)                   | 1752 (28.9)                  | <0.001          |
| Hypertension                                 | 4477 (60.5)                 | 788 (58.2)                   | 3689 (61.0)                  | 0.061           |
| Age (≥75 years)                              | 2565 (34.6)                 | 478 (25.3)                   | 2087 (34.5)                  | 0.567           |
| Diabetes mellitus                            | 1359 (18.3)                 | 198 (14.6)                   | 1161 (19.2)                  | <0.001          |
| Stroke/TIA                                   | 1022 (13.8)                 | 163 (12.0)                   | 859 (14.2)                   | 0.038           |
| CHADS <sub>2</sub> score                     | 1.7±1.2                     | 1.6±1.2                      | 1.7±1.2                      | <0.001          |
| CHA <sub>2</sub> DS <sub>2</sub> -VASc score | 2.8±1.6                     | 2.6±1.6                      | 2.8±1.6                      | <0.001          |
| HAS-BLED score                               | 1.5±1.0                     | 1.4±1.0                      | 1.5±1.0                      | <0.001          |
| Heart rate, /min                             | 72.5±13.2                   | 72.4±13.5                    | 72.5±13.1                    | 0.905           |
| Systolic BP, mmHg                            | 126.0±16.2                  | 126.1±15.2                   | 126.0±16.4                   | 0.689           |
| Diastolic BP, mmHg                           | 73.5±17.0                   | 74.1±22.4                    | 73.4±15.5                    | 0.148           |
| Warfarin                                     | 6404 (86.5)                 | 1116 (82.4)                  | 5288 (87.4)                  | <0.001          |
| Dosage, mg/day                               | 2.9±1.2                     | 2.9±1.2                      | 2.9±1.2                      | 0.088           |
| INR                                          | 1.91±0.49                   | 1.92±0.49                    | 1.90±0.49                    | 0.205           |
| TTR**, %                                     | 59.3±29.2<br>[n=6064]       | 59.3±29.8<br>[n=1068]        | 59.3±29.0<br>[n=4996]        | 0.965           |
| Antiplatelet                                 | 1937 (26.2)                 | 327 (24.2)                   | 1610 (26.6)                  | 0.063           |
| Aspirin                                      | 1675 (22.6)                 | 282 (20.8)                   | 1393 (23.0)                  | 0.082           |
| Others                                       | 433 (5.8)                   | 72 (5.3)                     | 361 (6.0)                    | 0.356           |
| Warfarin+antiplatelet                        | 1358 (18.3)                 | 204 (15.1)                   | 1154 (19.1)                  | <0.001          |

Data are number of patients (%) or mean±SD.

CrCl, creatinine clearance; HCM, hypertrophic cardiomyopathy; DCM, dilated cardiomyopathy; COPD, chronic obstructive pulmonary disease; CHADS<sub>2</sub>, congestive heart failure, hypertension, age ≥75 years, diabetes mellitus, and history of stroke or TIA; CHA<sub>2</sub>DS<sub>2</sub>-VASc, CHADS<sub>2</sub> components plus vascular disease (coronary artery disease), age 65–74 years, and female sex; HAS-BLED, hypertension (systolic BP ≥140 mmHg), abnormal renal/liver function, stroke, bleeding history or predisposition, labile INR (episodes of INR ≥3.5), elderly (age >65 years), drugs (use of antiplatelets)/alcohol concomitantly; TIA, transient ischemic attack; BP, blood pressure; INR, international normalized ratio of prothrombin time; TTR, time in therapeutic range.

\* Comparison between patients with and without CrCl data.

\*\* Target INR was 2.0–3.0 (<70 years) or 1.6–2.6 (≥70 years).

**Supplementary Table 2. Baseline characteristics of patients characterized by creatinine clearance and warfarin at baseline**

|                                              | Creatinine clearance values |                  |             |                  |                   |             |                  |                   |             |                  |                   |             |
|----------------------------------------------|-----------------------------|------------------|-------------|------------------|-------------------|-------------|------------------|-------------------|-------------|------------------|-------------------|-------------|
|                                              | <30 mL/min                  |                  |             | 30–49.9 mL/min   |                   |             | 50–79.9 mL/min   |                   |             | ≥80 mL/min       |                   |             |
|                                              | W (–)<br>(n=34)             | W (+)<br>(n=322) | P<br>value* | W (–)<br>(n=137) | W (+)<br>(n=1064) | P<br>value* | W (–)<br>(n=322) | W (+)<br>(n=2364) | P<br>value* | W (–)<br>(n=271) | W (+)<br>(n=1538) | P<br>value* |
| Age, years                                   | 82.1±8.7                    | 79.6±7.8         | 0.078       | 78.8±7.3         | 77.5±6.3          | 0.028       | 70.1±7.5         | 70.8±6.9          | 0.093       | 58.3±9.7         | 61.6±8.9          | <0.001      |
| Female                                       | 13 (38.2)                   | 168 (52.2)       | 0.122       | 54 (39.4)        | 427 (40.1)        | 0.872       | 104 (32.3)       | 660 (27.9)        | 0.102       | 47 (17.3)        | 213 (17.8)        | 0.871       |
| CrCl, mL/min                                 | 20.2±7.3                    | 22.0±6.5         | 0.137       | 40.7±5.6         | 41.4±5.6          | 0.177       | 65.5±8.6         | 64.6±8.3          | 0.057       | 103.1±26.7       | 100.4±20.4        | 0.056       |
| Comorbidities                                |                             |                  |             |                  |                   |             |                  |                   |             |                  |                   |             |
| Coronary artery disease                      | 7 (20.6)                    | 70 (21.7)        | 0.877       | 15 (10.9)        | 165 (15.5)        | 0.159       | 37 (11.5)        | 239 (10.1)        | 0.444       | 17 (6.3)         | 126 (8.2)         | 0.280       |
| Cardiomyopathy                               | 3 (8.8)                     | 42 (13.0)        | 0.481       | 9 (6.6)          | 91 (8.6)          | 0.429       | 13 (4.0)         | 217 (9.2)         | 0.002       | 12 (4.4)         | 160 (10.4)        | 0.002       |
| COPD                                         | 1 (2.9)                     | 4 (1.2)          | 0.423       | 5 (3.6)          | 38 (3.6)          | 0.963       | 5 (1.6)          | 48 (2.0)          | 0.563       | 0 (0.0)          | 15 (1.0)          | <0.001      |
| Hyperthyroidism                              | 0 (0.0)                     | 7 (2.2)          | 0.385       | 2 (1.5)          | 12 (1.1)          | 0.733       | 4 (1.2)          | 32 (1.4)          | 0.870       | 6 (2.2)          | 39 (2.5)          | 0.754       |
| Risk factors for stroke                      |                             |                  |             |                  |                   |             |                  |                   |             |                  |                   |             |
| Heart failure                                | 18 (58.8)                   | 205 (63.7)       | 0.219       | 40 (29.2)        | 422 (41.5)        | 0.006       | 47 (14.6)        | 619 (26.2)        | <0.001      | 17 (6.3)         | 364 (23.7)        | <0.001      |
| Hypertension                                 | 20 (52.9)                   | 214 (66.5)       | 0.372       | 91 (66.4)        | 694 (65.2)        | 0.782       | 185 (57.5)       | 1465 (62.0)       | 0.118       | 128 (47.2)       | 892 (58.0)        | 0.001       |
| Age (≥75 years)                              | 28 (82.4)                   | 254 (78.9)       | 0.635       | 108 (78.8)       | 758 (71.2)        | 0.062       | 97 (69.9)        | 744 (31.5)        | 0.625       | 8 (3.0)          | 90 (5.9)          | 0.052       |
| Diabetes mellitus                            | 7 (20.6)                    | 74 (23.0)        | 0.752       | 26 (19.0)        | 216 (20.3)        | 0.716       | 44 (13.7)        | 448 (19.0)        | 0.021       | 39 (14.4)        | 307 (20.0)        | 0.032       |
| Stroke/TIA                                   | 10 (29.4)                   | 55 (17.1)        | 0.077       | 20 (14.6)        | 198 (18.6)        | 0.252       | 21 (6.5)         | 364 (15.4)        | <0.001      | 5 (1.8)          | 186 (12.1)        | <0.001      |
| CHADS <sub>2</sub> score                     | 2.7±1.3                     | 2.7±1.2          | 0.728       | 2.2±1.2          | 2.4±1.2           | 0.240       | 1.3±1.1          | 1.7±1.2           | <0.001      | 0.7±0.8          | 1.3±1.1           | <0.001      |
| CHA <sub>2</sub> DS <sub>2</sub> -VASc score | 4.3±1.5                     | 4.4±1.4          | 0.694       | 3.7±1.4          | 3.9±1.4           | 0.087       | 2.5±1.4          | 2.9±1.4           | <0.001      | 1.3±1.2          | 2.0±1.4           | <0.001      |
| HAS-BLED score                               | 2.5±0.9                     | 2.2±1.0          | 0.053       | 2.0±0.8          | 1.9±0.9           | 0.095       | 1.7±0.9          | 1.5±0.9           | 0.001       | 1.0±0.9          | 1.0±1.0           | 0.870       |
| INR                                          | -                           | 1.89±0.52        | -           | -                | 1.92±0.53         | -           | -                | 1.90±0.47         | -           | -                | 1.90±0.49         | -           |
| TTR**, %                                     | -                           | 61.7±26.5        | -           | -                | 69.8±24.8         | -           | -                | 61.9±28.3         | -           | -                | 47.5±29.5         | -           |
|                                              |                             | [n=299]          |             |                  | [n=997]           |             |                  | [n=2251]          |             |                  | [n=1449]          |             |
| Antiplatelet use                             | 24 (70.6)                   | 99 (30.7)        | <0.001      | 89 (65.0)        | 298 (28.0)        | <0.001      | 200 (62.1)       | 500 (21.2)        | <0.001      | 143 (52.0)       | 257 (16.7)        | <0.001      |

Data are number of patients (%) or mean±SD.

W, warfarin; CrCl, creatinine clearance; COPD, chronic obstructive pulmonary disease; CHADS<sub>2</sub>, congestive heart failure, hypertension, age ≥75 years, diabetes mellitus, and history of stroke or TIA; CHA<sub>2</sub>DS<sub>2</sub>-VASc, CHADS<sub>2</sub> components plus vascular disease (coronary artery disease), age 65–74 years, and female sex; HAS-BLED, hypertension (systolic BP ≥140 mmHg), abnormal renal/liver function, stroke, bleeding history or predisposition, labile INR (episodes of INR ≥3.5), elderly (age >65 years), drugs (use of antiplatelets)/alcohol concomitantly; TIA, transient ischemic attack; INR, international normalized ratio of prothrombin time; TTR, time in therapeutic range.

\* Comparison between W (–) and W (+).

\*\* Target INR was 2.0–3.0 (<70 years) or 1.6–2.6 (≥70 years).

**Supplementary Table 3. Two-year event rates in patients with and without creatinine clearance data**

|                             | <b>Overall<br/>(n=7406)</b> | <b>CrCl (-)<br/>(n=1354)</b> | <b>CrCl (+)<br/>(n=6052)</b> | <b>P value*</b> |
|-----------------------------|-----------------------------|------------------------------|------------------------------|-----------------|
| <b>Thromboembolism</b>      | 126 (1.7%)                  | 17 (1.3%)                    | 109 (1.8%)                   | 0.198           |
| <b>Major hemorrhage</b>     | 140 (1.9%)                  | 22 (1.6%)                    | 118 (1.9%)                   | 0.494           |
| <b>All-cause death</b>      | 195 (2.6%)                  | 35 (2.6%)                    | 160 (2.6%)                   | 0.979           |
| <b>Cardiovascular death</b> | 68 (0.9%)                   | 13 (1.0%)                    | 55 (0.9%)                    | 0.983           |
| <b>Composite events**</b>   | 461 (6.2%)                  | 74 (5.5%)                    | 387 (6.4%)                   | 0.224           |

Data are number of patients (%).

\* Comparison between patients with and without CrCl data.

\*\* Thromboembolism, major hemorrhage, and all-cause death.

**Supplementary Table 4. Two-year event rates characterized by warfarin treatment at the time of events or the end of follow up period and creatinine clearance.**

|                      | Creatinine clearance values |                  |          |                  |                   |          |                  |                   |          |                  |                   |          |
|----------------------|-----------------------------|------------------|----------|------------------|-------------------|----------|------------------|-------------------|----------|------------------|-------------------|----------|
|                      | <30 mL/min                  |                  |          | 30–49.9 mL/min   |                   |          | 50–79.9 mL/min   |                   |          | ≥80 mL/min       |                   |          |
|                      | W (–)<br>(n=48)             | W (+)<br>(n=308) | P value* | W (–)<br>(n=170) | W (+)<br>(n=1031) | P value* | W (–)<br>(n=341) | W (+)<br>(n=2325) | P value* | W (–)<br>(n=322) | W (+)<br>(n=1487) | P value* |
| Thromboembolism      | 0.0                         | 2.3              | 0.291    | 5.3              | 2.3               | 0.028    | 3.8              | 1.7               | 0.009    | 1.9              | 0.7               | 0.039    |
| Major hemorrhage     | 2.1                         | 3.9              | 0.533    | 1.2              | 3.1               | 0.160    | 1.5              | 1.8               | 0.669    | 0.9              | 1.4               | 0.494    |
| All-cause death      | 41.7                        | 6.8              | <0.001   | 15.9             | 3.1               | <0.001   | 3.8              | 1.4               | 0.004    | 1.2              | 0.6               | 0.388    |
| Cardiovascular death | 14.6                        | 2.6              | <0.001   | 4.1              | 1.6               | 0.024    | 0.6              | 0.3               | 0.487    | 0.6              | 0.3               | 0.455    |
| Composite events**   | 43.8                        | 13.0             | <0.001   | 22.4             | 8.5               | <0.001   | 9.1              | 4.9               | 0.002    | 4.0              | 2.7               | 0.194    |

Data are % per 2 years.

W, warfarin.

\* Comparison between W (–) and W (+).

\*\* Thromboembolism, major hemorrhage, and all-cause death.

**Supplementary Table 5. Sensitivity and specificity of cutoff creatinine clearance values for events**

|                             | Creatinine clearance values (mL/min) |             |             |             |             |             |
|-----------------------------|--------------------------------------|-------------|-------------|-------------|-------------|-------------|
|                             | <30                                  |             | <50         |             | <80         |             |
|                             | Sensitivity                          | Specificity | Sensitivity | Specificity | Sensitivity | Specificity |
| <b>Thromboembolism</b>      | 6.4%                                 | 94.1%       | 36.7%       | 74.5%       | 85.3%       | 30.2%       |
| <b>Major hemorrhage</b>     | 21.2%                                | 86.5%       | 39.8%       | 74.6%       | 79.7%       | 30.1%       |
| <b>All-cause death</b>      | 25.6%                                | 94.7%       | 62.5%       | 75.3%       | 91.9%       | 30.5%       |
| <b>Cardiovascular death</b> | 27.3%                                | 94.3%       | 69.1%       | 74.7%       | 87.3%       | 30.0%       |
| <b>Composite events*</b>    | 16.8%                                | 94.1%       | 48.3%       | 75.8%       | 86.3%       | 31.0%       |

\* Thromboembolism, major hemorrhage, and all-cause death.
